# Supplementary material for: Bone Marrow Mesenchymal Stromal/Stem Cell-Derived Extracellular Vesicles Promote Corneal Wound Repair by Regulating Inflammation and Angiogenesis
Source: MDPI journal article supplement (doi:10.3390/cells11233892), 2022-12-02
Supplement: s1 [file s1]

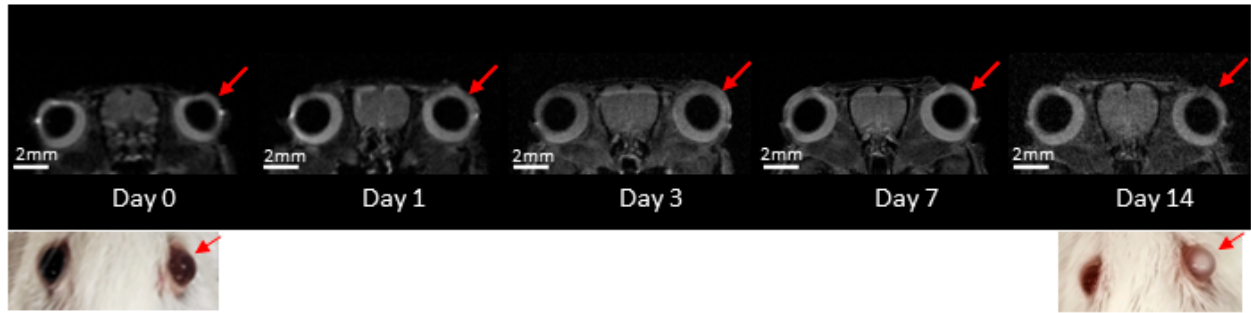

**Figure S1. Alkali-burn mouse model set-up and MRI assessment of corneal damage over time.** 7T MRI  $T_{2w}$  -images of corneal damage following alkali treatment at Days 0, 1, 3, 7 and 14. Red arrow indicates the injured eye of animal models with application of NaOH paper disc for 30 sec. Inset shows visible corneal damage at Day 14 post alkali-burn.

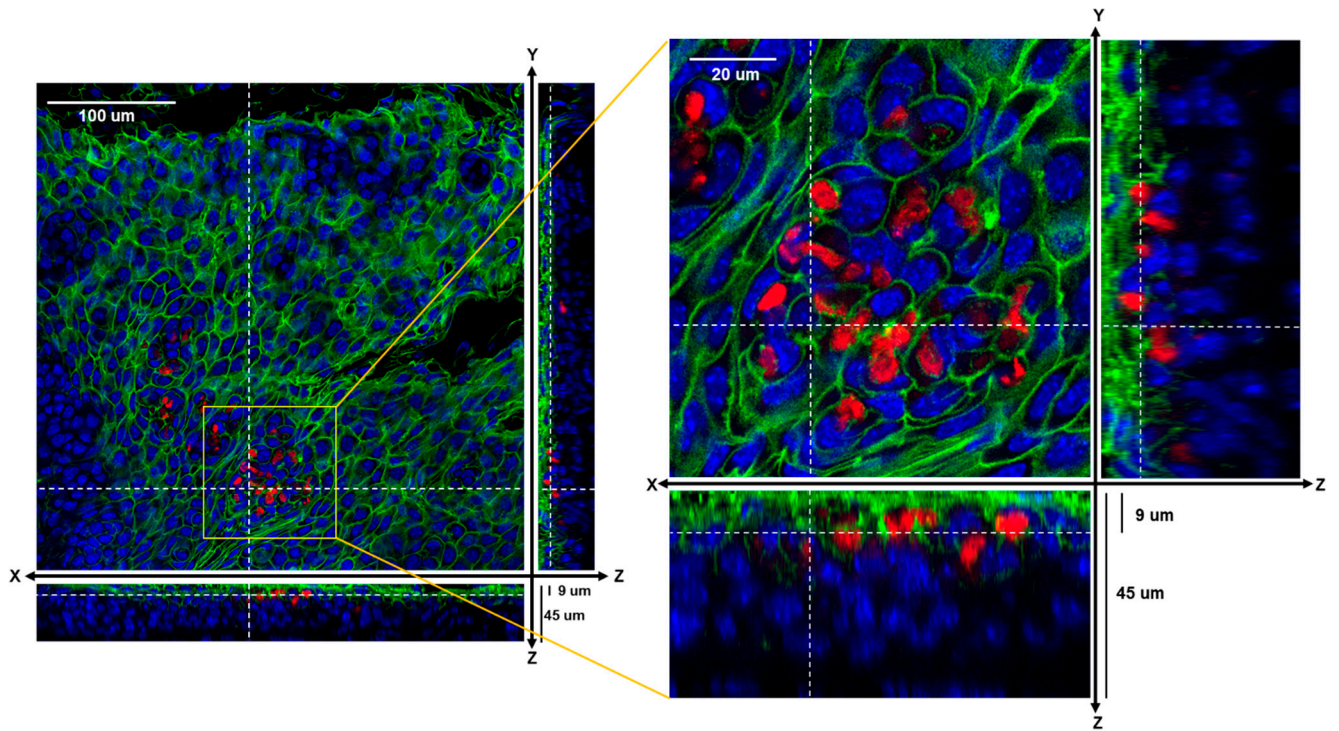

Figure S2: Confocal microscopy (Leica Sp5) images of corneal whole mounts, following treatment of the injured corneas with PKH26-labelled (Red) MSC-EVs at 40× magnification (scale bar: 100nm). A zoomed insert is shown for detail (scale bar: 20nm). F-actin and nuclei were stained with phalloidin-FITC (green) and DAPI (blue), respectively. The axes represent 3D corneal structure.

**A** Gd-AAZTA-MADEC chemical structure

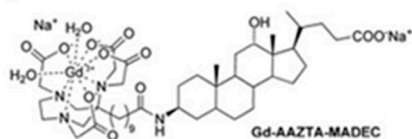

**B** Region Of Interest for MRI quantification

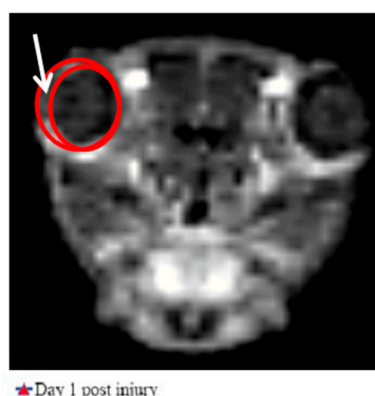

**C** MRI Signal enhancement before Gd-AAZTA-MADEC injection

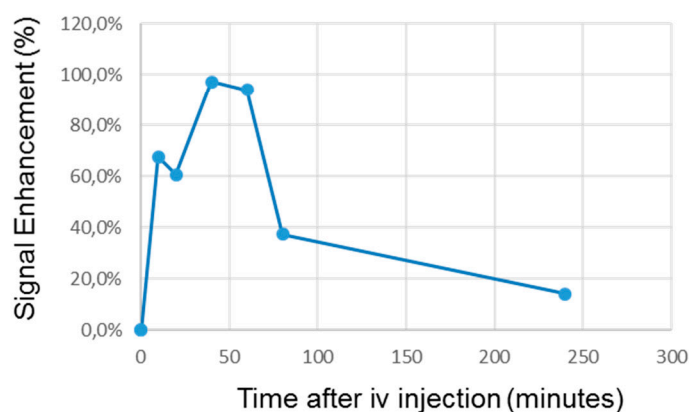

**Figure S3: MRI-based corneal angiogenesis evaluation with Gd-AAZTA-MADEC set-up** (A) Chemical structure of Gd-AAZTA-MADEC. (B) Representative Region of Interest (ROI) drawn on a 1T MRI image of cornea. Arrow indicates quantified region. (C) Representative MRI signal enhancement between injured and uninjured contralateral eyes followed for 4 h after injection of Gd-AAZTA-MADEC at Day 3, where Signal Intensities post-Gd-AAZTA-MADEC injection were normalized against signal intensities measured in the same regions before the injection (time=0).

**Table S1:** qPCR primer sequences using SYBR Green® technology for *Mus musculus* (Mm) and *Homo sapiens* (Hs).

| <u>Mm PRIMER</u>         | Forward Sequence          | Reverse Sequence         |
|--------------------------|---------------------------|--------------------------|
| <i>Inflammation gene</i> |                           |                          |
| <b>Tnfa</b>              | ACTTCTGCTCTAGGGTGAGTGC    | GGCCAGGGGGGTATTCTTG      |
| <b>Il1b</b>              | AGTTGACGGACCCCAAAG        | AGCTGGATGCTCTCATCAGG     |
| <b>Il1r2</b>             | GCAAGAAGCAGCAAGGTACA      | CCGCACCAACTTCCTGAG       |
| <b>Il6</b>               | GCTACCAAAGTGGATATAATCAGGA | CCAGGTAGCTATGGTACTCCAGAA |
| <b>Spp1 (Opn)</b>        | GGAAACCAGCCAAGGTAAGC      | TGCCAATCTCATGGTCGTAG     |
| <b>Tgfβ</b>              | TGGAGCAACATGTGGAAGTC      | GTCAGCAGCCGGTTACCA       |
| <i>Angiogenic gene</i>   |                           |                          |
| <b>Vegfa</b>             | AAAAACGAAAGCGCAAGAAA      | TTTCTCCGCTCTGAACAAGG     |
| <b>Vegfd</b>             | GCAACTTTCTATGACACTGAAACAC | TCTCTCTAGGGCTGCATTGG     |
| <b>Flt1</b>              | GGCCCGGGATATTTATAAGA      | CCATCCATTTTAGGGGAAGT     |
| <b>Flt4</b>              | TGTCACCTTCGACTGGGATT      | TGCTGGAGAGTTCTGTGTGG     |
| <b>Kdr(Flk1)</b>         | GGGGTATGGAGACGAGCTG       | GCACAGATCTGACTAAATTGCTG  |
| <i>Housekeeping</i>      |                           |                          |
| <b>Gapdh</b>             | AGCCCAATCGCTCAG           | GCCCAATACGACCAA          |

| <u>Hs PRIMER</u>         | Forward Sequence       | Reverse Sequence       |
|--------------------------|------------------------|------------------------|
| <i>Inflammation gene</i> |                        |                        |
| <b>TNFA</b>              | AGAACCGGCAAGAAATCAAG   | CTGGTAGGAGTCCTTCTTGTC  |
| <b>PTGS2 (COX2)</b>      | GCTTTATGCTGAAGCCCTATGA | TCCAAGTCTGCTAGACATTTCC |
| <b>IL1B</b>              | TACCTGTCCTGCGTGTTGAA   | TCTTTGGGTAATTTTGGGATCT |
| <i>Housekeeping</i>      |                        |                        |
| <b>GAPDH</b>             | AGCCACATCGCTCAGACAC    | GCCCAATACGACCAAATCC    |
